# Supplementary material
Source: HighWire-hosted journal article supplement (https://jitc.bmj.com/content/12/10/e009198)
Supplement: inline-supplementary-material-2 [file inline-supplementary-material-2.pdf]

## NSGS mice humanized with cord blood mononuclear cells show sustained and functional myeloid-lymphoid representation with limited graft-versus-host-disease

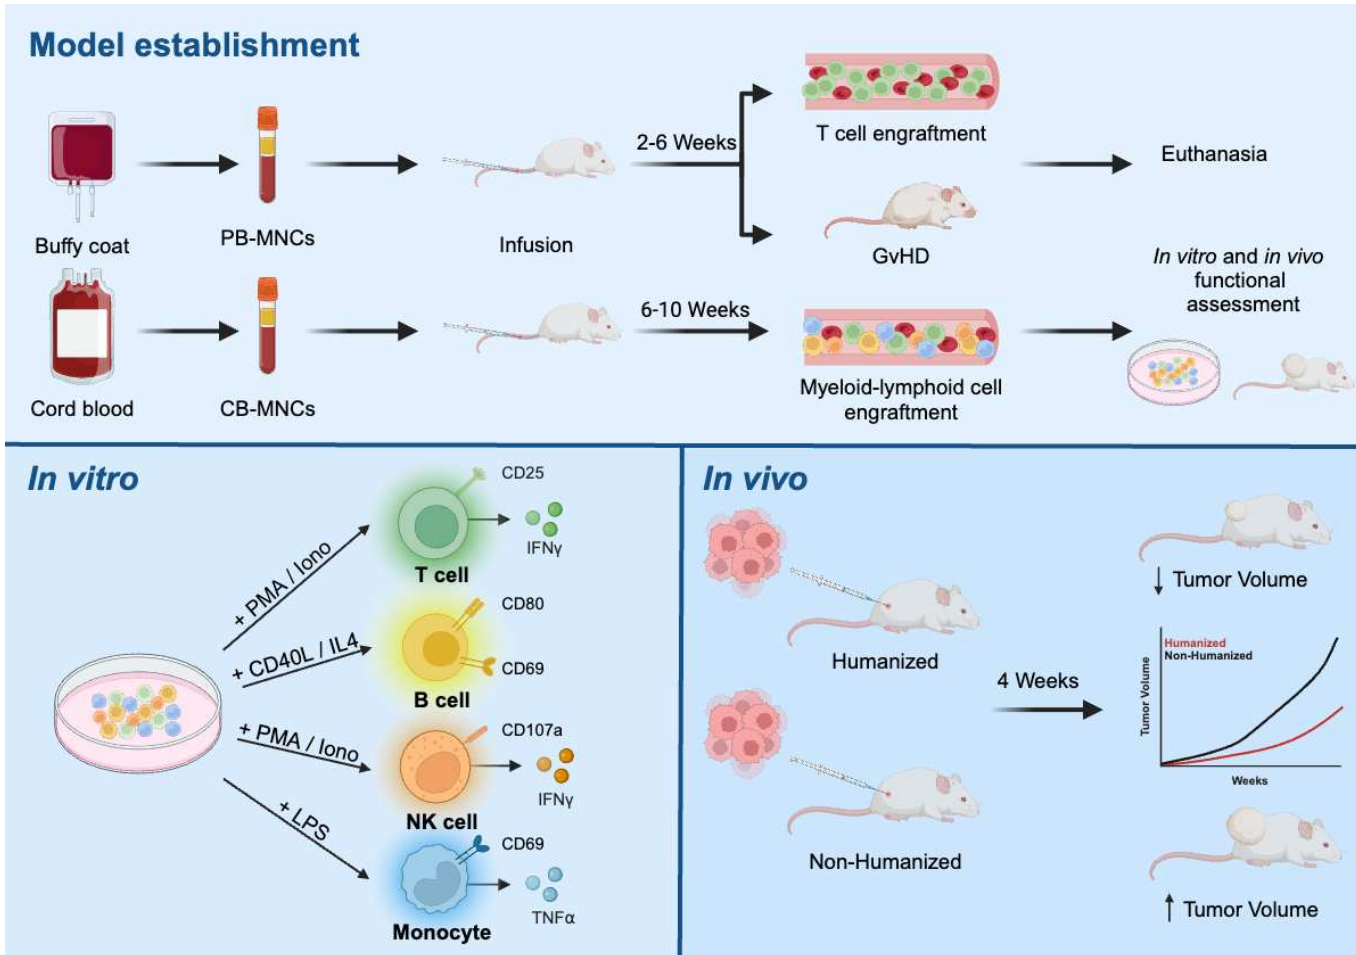

### Authors

Carla Panisello, Rosario Aschero, Alba Martínez-Moreno, Heleia Roca-Ho, Aïda Falgàs, E Azucena González-Navarro, Julieta Carabelli, Edwards Pradenas, María Lázaro-Díez, Julia G. Prado, Julià Blanco, Jorge Carrillo, Manel Juan, Angel M. Carcaboso, Clara Bueno, Pablo Menéndez

### Correspondence

[pmenendez@carrerasresearch.org](mailto:pmenendez@carrerasresearch.org)

[cbueno@carrerasresearch.org](mailto:cbueno@carrerasresearch.org)

### In brief

Current humanized mouse models based on CD34+ cells or peripheral blood mononuclear cells (PB-MNCs) face severe limitations, such as inefficient long-term immune reconstitution and high rates of graft-versus-host disease (GVHD), respectively. This study introduces a new model, with the use of cord blood mononuclear cells (CB-MNCs), which demonstrated rapid, sustained and functional myeloid-lymphoid immune engraftment with limited GvHD. This approach offers a promising platform for cancer immunotherapy preclinical testing.
